# Supplementary material for: Fluoroscopy-Guided Percutaneous Transthoracic Pleural Forceps Biopsy in Patients With Exudative Pleural Effusion
Source: PubMed Central journal article supplement — Korean J Radiol. 2024 Jul 15;25(8):706–14. doi: 10.3348/kjr.2023.0960 (PMC11306004; doi:10.3348/kjr.2023.0960), 2024-07-15
Supplement: kjr-25-706-s001.pdf [file kjr-25-706-s001.pdf]

## SUPPLEMENTS

**Supplementary Table 1.** Final diagnosis in the eight patients with false-negative PTPFB results

|           | CT result            |                                                            | PTPFB result | Cytologic result        | Final diagnosis                |
|-----------|----------------------|------------------------------------------------------------|--------------|-------------------------|--------------------------------|
| Patient 1 | Suspected malignancy | Calcification                                              |              | Possible adenocarcinoma | Lung cancer                    |
| Patient 2 | Suspected malignancy | Soft tissue with a few fibrous nodules                     |              | Suspected malignancy    | Lung cancer                    |
| Patient 3 | Indeterminate        | Focal mesothelial proliferation                            |              | Negative for malignancy | Lung cancer                    |
| Patient 4 | Suspected malignancy | Chronic inflammation with mesothelial cells and fibrosis   |              | Possible adenocarcinoma | Renal cell carcinoma           |
| Patient 5 | Suspected malignancy | Some atypical cell infiltration                            |              | Negative for malignancy | Malignant pleural mesothelioma |
| Patient 6 | Suspected malignancy | Inflammation with mild fibrosis                            |              | Negative for malignancy | Lung cancer                    |
| Patient 7 | Suspected malignancy | Chronic inflammation with reactive mesothelial hyperplasia |              | A few atypical cells    | Lung cancer                    |
| Patient 8 | Indeterminate        | Chronic inflammation                                       |              | Negative for malignancy | Esophageal cancer              |

PTPFB = percutaneous transthoracic pleural forceps biopsy

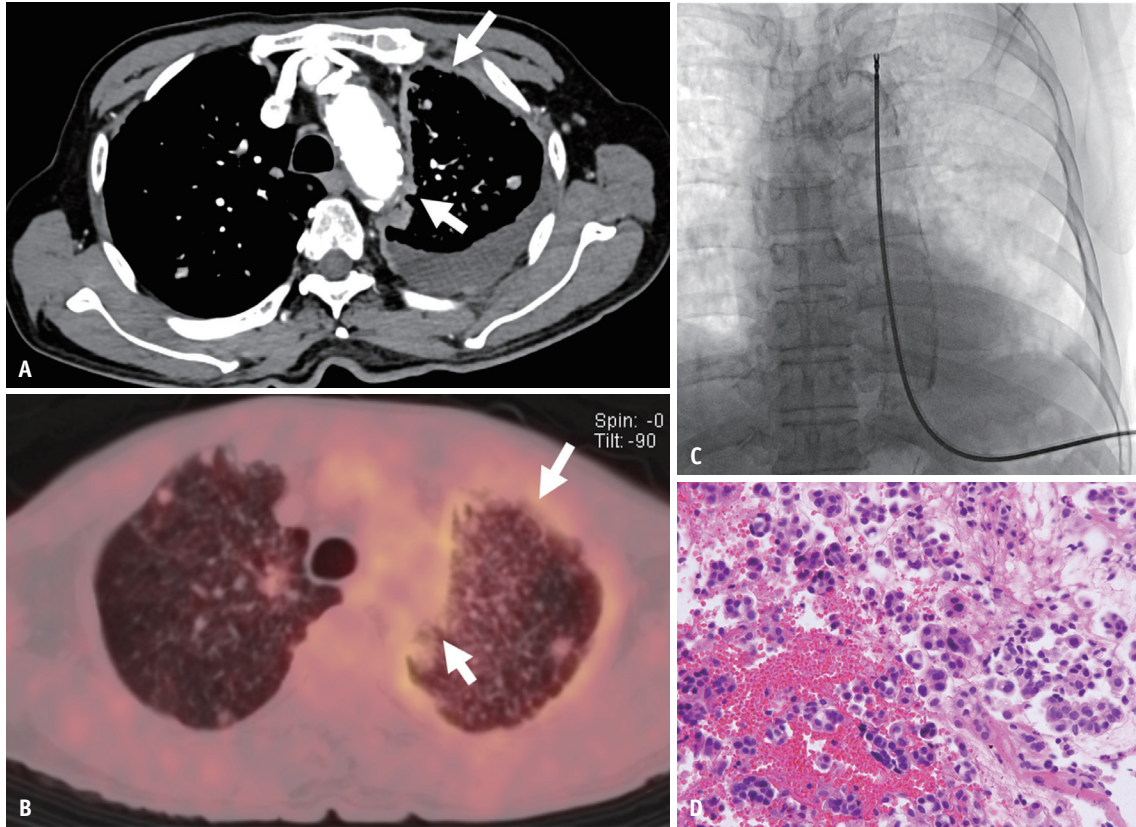

**Supplementary Fig. 1.** An 81-year-old male on medication for diabetes mellitus and hypertension presented to the outpatient department with dyspnea. **A:** Axial contrast-enhanced CT image showing diffuse thickening and enhancement of the left pleura (arrows) with moderate left pleural effusion. **B:** Axial  $^{18}\text{F}$ -fluorodeoxyglucose PET image showing a mild diffuse increase in pleural uptake (arrows). Multiple bilateral lung nodules are also observed. **C:** Fluoroscopy-guided percutaneous transthoracic pleural biopsy of the left upper thorax. **D:** Photomicrographs (hematoxylin and eosin stain, x 200) showing atypical glandular proliferation on a bloody background suggestive of adenocarcinoma.

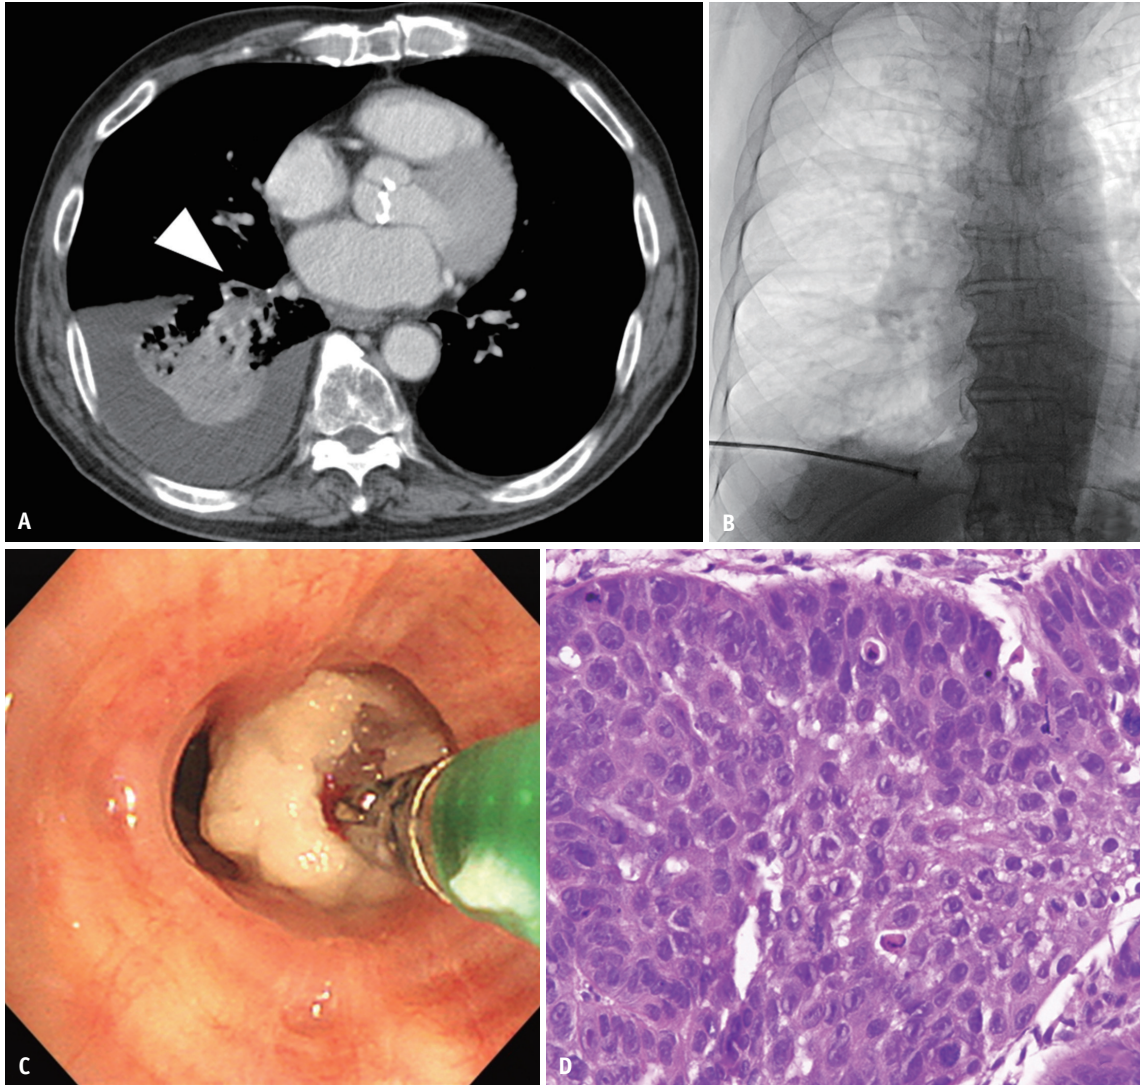

**Supplementary Fig. 2.** An 83-year-old male with dyspnea and hemoptysis admitted to the emergency department. **A:** Axial contrast-enhanced CT showing a lesion (arrowhead) occupying the endobronchial space with atelectasis. Moderate pleural effusion is also observed. **B:** Fluoroscopy-guided percutaneous transthoracic pleural biopsy of the right lower thorax. The biopsy results indicate focal mesothelial proliferation without evidence of malignancy (not shown). **C:** Bronchoscopy showing a lobulated, contoured, whitish endobronchial obstructive lesion in the right lower anterior segmental bronchus. A bronchoscopy-guided biopsy is performed. **D:** Photomicrographs (hematoxylin and eosin stain, x 400) showing atypical squamous epithelium with intercellular bridges and abundant mitotic cells, suggestive of moderately differentiated squamous cell carcinoma.



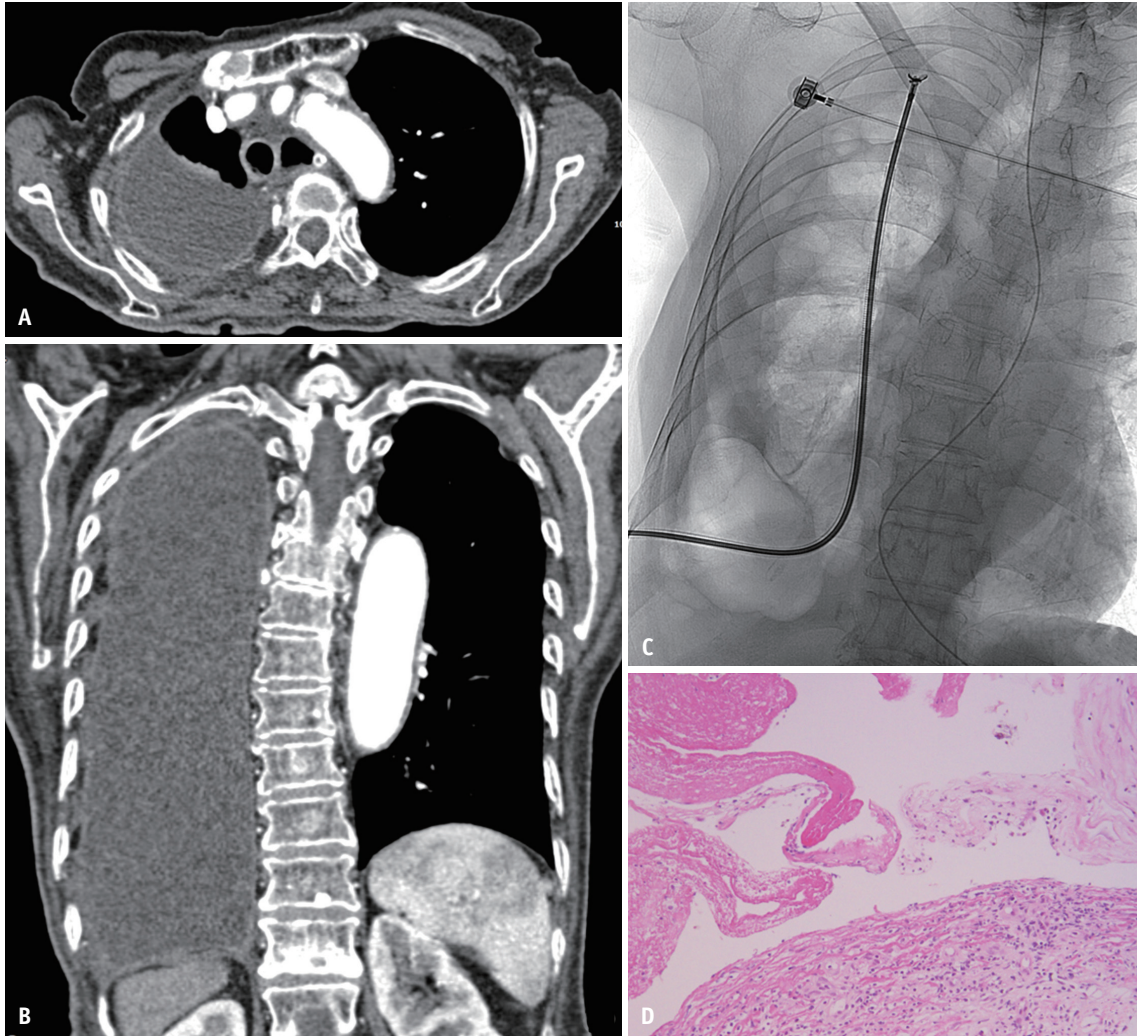

**Supplementary Fig. 3.** An 87-year-old female presenting with fever and a history of pelvicoscopic salpingo-oophorectomy for left ovarian cancer eight years previously. **A, B:** Axial and coronal contrast-enhanced CT images showing diffuse pleural thickening with enhancement. A large, right-sided pleural effusion is observed. **C:** Fluoroscopy-guided percutaneous transthoracic pleural biopsy of the upper right thorax. **D:** Photomicrographs (hematoxylin and eosin stain, x 2400) showing fibrinoid exudates and chronic inflammatory cell infiltration.
